# Supplementary material for: How to measure the impacts of antibiotic resistance and antibiotic development on empiric therapy: new composite indices
Source: PubMed Central journal article supplement — BMJ Open. 2016 Dec 16;6(12):e012040. doi: 10.1136/bmjopen-2016-012040 (PMC5168677; doi:10.1136/bmjopen-2016-012040), 2016-12-16
Supplement: bmjopen-2016-012040supp_appendixA.pdf [file bmjopen-2016-012040supp_appendixA.pdf]

## Appendix A Intrinsic, implied and default resistance

Magiorakos et al. [1] and CLSI [2] are our primary sources of information on intrinsic resistance. Sanford et al. [3] and Gilbert et al. [4] have been used to fill in missing susceptibilities, but do not distinguish between acquired and intrinsic resistance. In cases where Sanford et al. [3] and Gilbert et al. [4] indicate resistance we therefore rely on other sources to distinguish between intrinsic and acquired resistance. These sources are explicitly acknowledged in the following notes, as are instances of disagreement among our primary sources:

- Amoxicillin and penicillin: Amoxicillin is similar to ampicillin [5], and penicillin does not cover Gram-negative bacilli [6].
- Enterobacteriaceae: We assume that all Enterobacteriaceae resistant to ceftriaxone, cefazolin or cefotaxime produce ESBLs, AmpC beta-lactamases, or KPCs, and are therefore resistant to fluoroquinolones, trimethoprim-sulfamethoxazole, penicillins, cephalosporins, cephamycins, and  $\beta$ -lactam/lactamase inhibitor combinations [4, 7, 8]. We assume that all Enterobacteriaceae resistant to carbapenems produce KPCs, and are therefore also resistant to chloramphenicol [4, 8]. CLSI [2] provides breakpoints for Polymyxin B, and FDA drug labels indicate susceptibility among *E. coli*, *Enterobacter aerogenes*, and *Klebsiella pneumoniae* strains. We assume that resistance to cephalexin among *Enterobacter spp.* and *Serratia marcescens* strains [3, 4] is intrinsic, and that all strains are intrinsically resistant to oxacillin and cloxacillin [5].
- *Pseudomonas aeruginosa*: CLSI [2] suggests that *P. aeruginosa* is intrinsically resistant to fosfomycin, but Magiorakos et al. [1] does not. We follow Magiorakos et al. [1]. FDA labels and Sanford et al. [3] suggest that some strains were once susceptible to ceftriaxone, but we follow CLSI [2] and assume intrinsic resistance. We also assume that resistance to the following drugs [3, 4] is intrinsic: nitrofurantoin, tigecycline, ampicillin, cefotaxime, cephalexin, oxacillin, cloxacillin and ceftaroline.

- *Acinetobacter* spp: Given potential susceptibility to extended-spectrum cephalosporins, we assume susceptibility to ceftaroline.
- Coagulase-negative Staphylococci (CoNS): According to FDA labels nitrofurantoin, clindamycin and ampicillin have in vitro activity against at least some strains of CoNS, so we assume susceptibility. CLSI [2] give breakpoints for doxycycline and minocycline, and our data show some susceptibility to doxycycline, so we assume former susceptibility.
- *Enterococcus*: CLSI [2] claims intrinsic resistance to all cephalosporins, but Gilbert et al. [4] claims that *E. faecalis* is susceptible to ceftaroline. We assume susceptibility. Sanford et al. [3] and Gilbert et al. [4] also claim resistance to erythromycin and tetracycline but CLSI [2] provides breakpoints so we assume that at least some strains are susceptible. Gilbert et al. [4] claims partial susceptibility of *E. faecium* to imipenem, but Magiorakos et al. [1] suggests intrinsic resistance, so we assume resistance. We assume that resistance to the following drugs [3, 4] is intrinsic: rifampin (*E. faecium*), ciprofloxacin (*E. faecium*), levofloxacin (*E. faecium*), cefotetan, ceftiofur, cloxacillin and oxacillin.

We used understanding of common multi-drug resistant strains (table 3) to fill gaps in our example antibiogram. We also used the following general knowledge of resistance patterns, assuming 100% susceptibility or resistance in cases where testing was not done:

- Enterobacteriaceae are generally susceptible to carbapenems [2] and generally resistant to ampicillin [4].
- *A. baumannii* strains are generally susceptible to polymyxins [2].
- Staphylococci are generally susceptible to daptomycin, linezolid, quinupristin-dalfopristin, and vancomycin [2], and generally resistant to ampicillin [4].

- CoNS strains are generally resistant to chloramphenicol, tetracyclines, amoxicillin-clavulanic acid, and aminoglycosides [4].
- Enterococci are generally susceptible to linezolid and daptomycin [2] and generally resistant to erythromycin and tetracyclines [4]. *E. faecalis* strains are generally susceptible to ampicillin [7], and generally resistant to ciprofloxacin and moxifloxacin [4].

Finally, we considered the potential impact of two new drugs:

- ceftazidime-avibactam (caz-avi): Caz-avi was active against 99.8% of clinical Enterobacteriaceae isolates from US medical centres in 2012-2013, 95.6% of *P. aeruginosa* isolates, and 26.4% of *A. baumannii* isolates [9]. We assume that staphylococci resistant to cefazolin are also resistant to caz-avi, and that enterococci are intrinsically resistant. Caz-avi remains active against carbapenemase (KPC)-producing Enterobacteriaceae [9]. According to these numbers, caz-avi would cover 95% of Gram-negative CLABSIs in our basket (similar to tobramycin). Coverage of Gram-negative CAUTIs would be 98% (similar to amikacin), and Gram-negative VAP coverage would be 90% (similar to gentamicin).
- ceftolozane-tazobactam (cef-tazo): Assuming a breakpoint of  $\leq 8$ mg/L [10] cef-tazo provided the following coverage of bacteria associated with healthcare associated UTIs in US and European hospitals in 2012: 99.9% of *E. coli*, 95.2% of *Enterobacter*, 90.9% of *Klebsiella*, 100% of *Serratia* and *Proteus*, 40% of *A. baumannii* and 93.4% of *P. aeruginosa* [11]. Susceptibility among pneumonia isolates was similar [12]. We assume that staphylococci resistant to cefazolin are also resistant to cef-tazo, and that enterococci are intrinsically resistant. Cef-tazo is not active against carbapenemase (KPC)-producing Enterobacteriaceae [11]. According to these numbers, cef-tazo would cover 90% of Gram-negative CLABSIs in our basket (similar to gentamicin). Coverage of Gram-negative CAUTIs would be 96% (similar to meropenem), and Gram-negative VAP coverage would be 88% (similar to gentamicin).

## References

1. Magiorakos AP, Srinivasan A, Carey RB et al. Multidrug-resistant, extensively drug-resistant and pandrug-resistant bacteria: an international expert proposal for interim standard definitions for acquired resistance. *Clin Microbiol Infect* 2012;18:268–281.
2. CLSI: Clinical and Laboratory Standards Institute. Performance standards for antimicrobial susceptibility testing: 23rd informational supplement M100-S19. CLSI, Wayne, PA, USA, 2013.
3. Sanford JP, Gilbert DN, Moellering RCJ et al., eds. The Sanford guide to antimicrobial therapy. 27th ed. Vienna, VA: Antimicrobial Therapy Inc., 1997.
4. Gilbert DN, Chambers HF, Eliopoulous GM et al., eds. The Sanford guide to antimicrobial therapy. 44th ed. Sperryville, VA: Antimicrobial Therapy Inc., 2014.
5. Zaffiri L, Gardner J, Toledo-Pereyra LH. History of antibiotics: From salvarsan to cephalosporins. *J Invest Surg* 2012;25:67–77.
6. Medeiros AA. Evolution and dissemination of beta-lactamases accelerated by generations of beta-lactam antibiotics. *Clin Infect Dis* 1997;24 Suppl 1:19–45.
7. MSH: Mount Sinai Hospital. Antimicrobial susceptibility testing manual. 2013. <http://www.mountsinai.on.ca/education/staff-professionals/microbiology>.
8. Vasoo S, Barreto JN, Tosh PK. Emerging issues in gram-negative bacterial resistance: an update for the practicing clinician. *Mayo Clin Proc* 2015;90:395–403.
9. Sader HS, Castanheira M, Flamm RK et al. Ceftazidime/avibactam tested against Gram-negative bacteria from intensive care unit (ICU) and non-ICU patients, including those with ventilator-associated pneumonia. *Int J Antimicrob Agents* 2015;46:53–59.
10. Farrell DJ, Sader HS, Flamm RK et al. Ceftolozane/tazobactam activity tested against Gram-negative bacterial isolates from hospitalised patients with pneumonia in US and European medical centres (2012). *Int J Antimicrob Agents* 2014;43:533–539.

11. Sader HS, Farrell DJ, Flamm RK et al. Ceftolozane/tazobactam activity tested against aerobic Gram-negative organisms isolated from intra-abdominal and urinary tract infections in European and United States hospitals (2012). *J Infect* 2014;69:266–277.
12. Sader HS, Farrell DJ, Castanheira M et al. Antimicrobial activity of ceftolozane/tazobactam tested against *Pseudomonas aeruginosa* and Enterobacteriaceae with various resistance patterns isolated in European hospitals (2011-12). *J Antimicrob Chemother* 2014;69:2713–2722.
