# Supplementary material for: How to measure the impacts of antibiotic resistance and antibiotic development on empiric therapy: new composite indices
Source: PubMed Central journal article supplement — BMJ Open. 2016 Dec 16;6(12):e012040. doi: 10.1136/bmjopen-2016-012040 (PMC5168677; doi:10.1136/bmjopen-2016-012040), 2016-12-16
Supplement: bmjopen-2016-012040supp_appendixC.pdf [file bmjopen-2016-012040supp_appendixC.pdf]

## Appendix C Supplemental figures

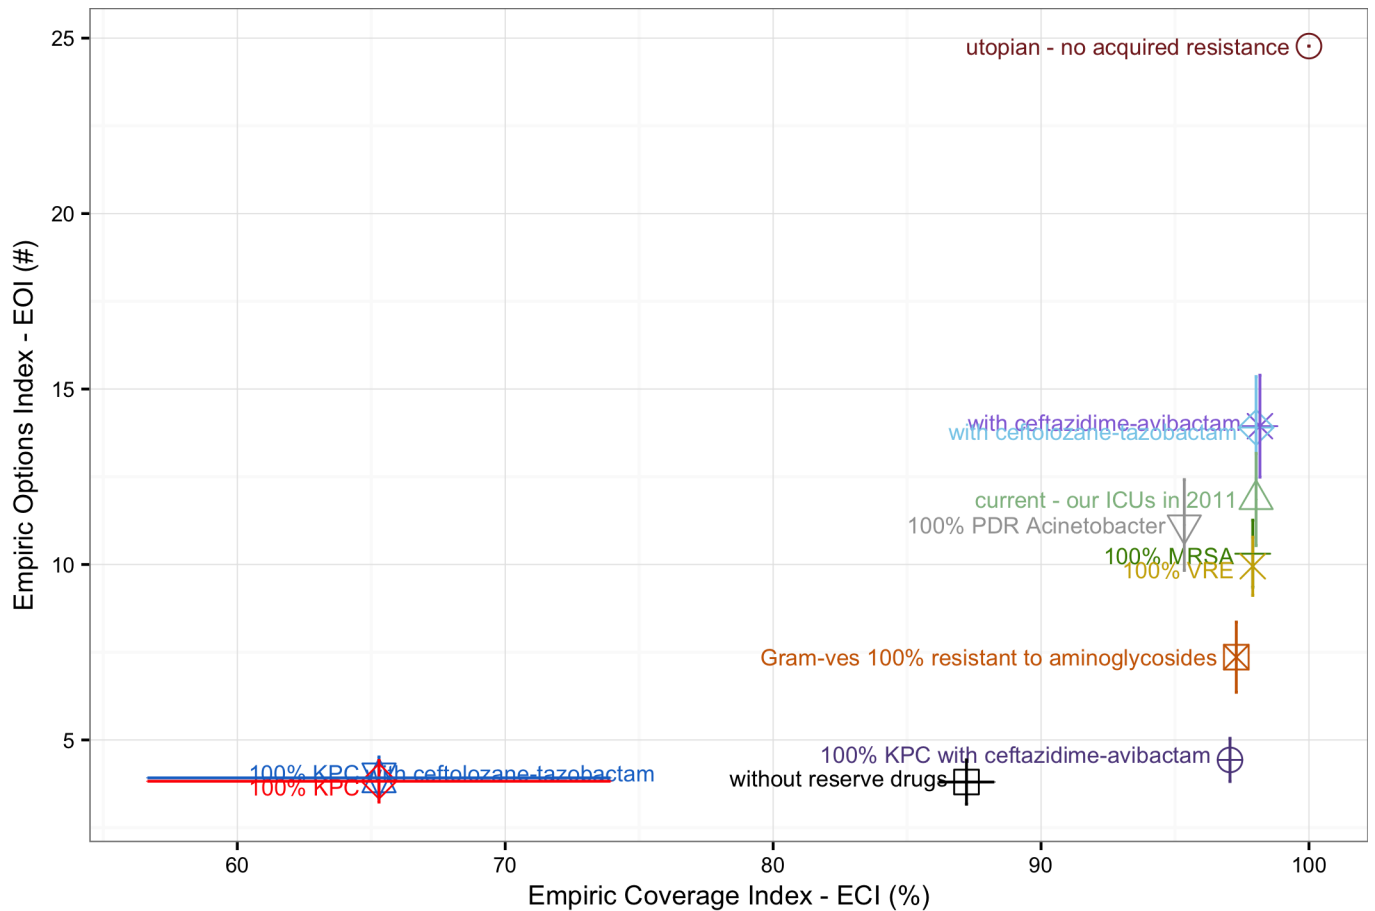

Figure C.1: Variation in indices among scenarios when antibiotic mixing slows the spread of resistance and increases the value of redundancy. See figure 4 for comparison and scenario descriptions. In this example, using 2 drugs instead of 1 slows the development of resistance by 10% ( $\alpha = 0.1$ ) (appendix B). The EOI would have been 25 without acquired resistance, and is now 10 to 13, so 48 to 60% of treatment potential has been lost.

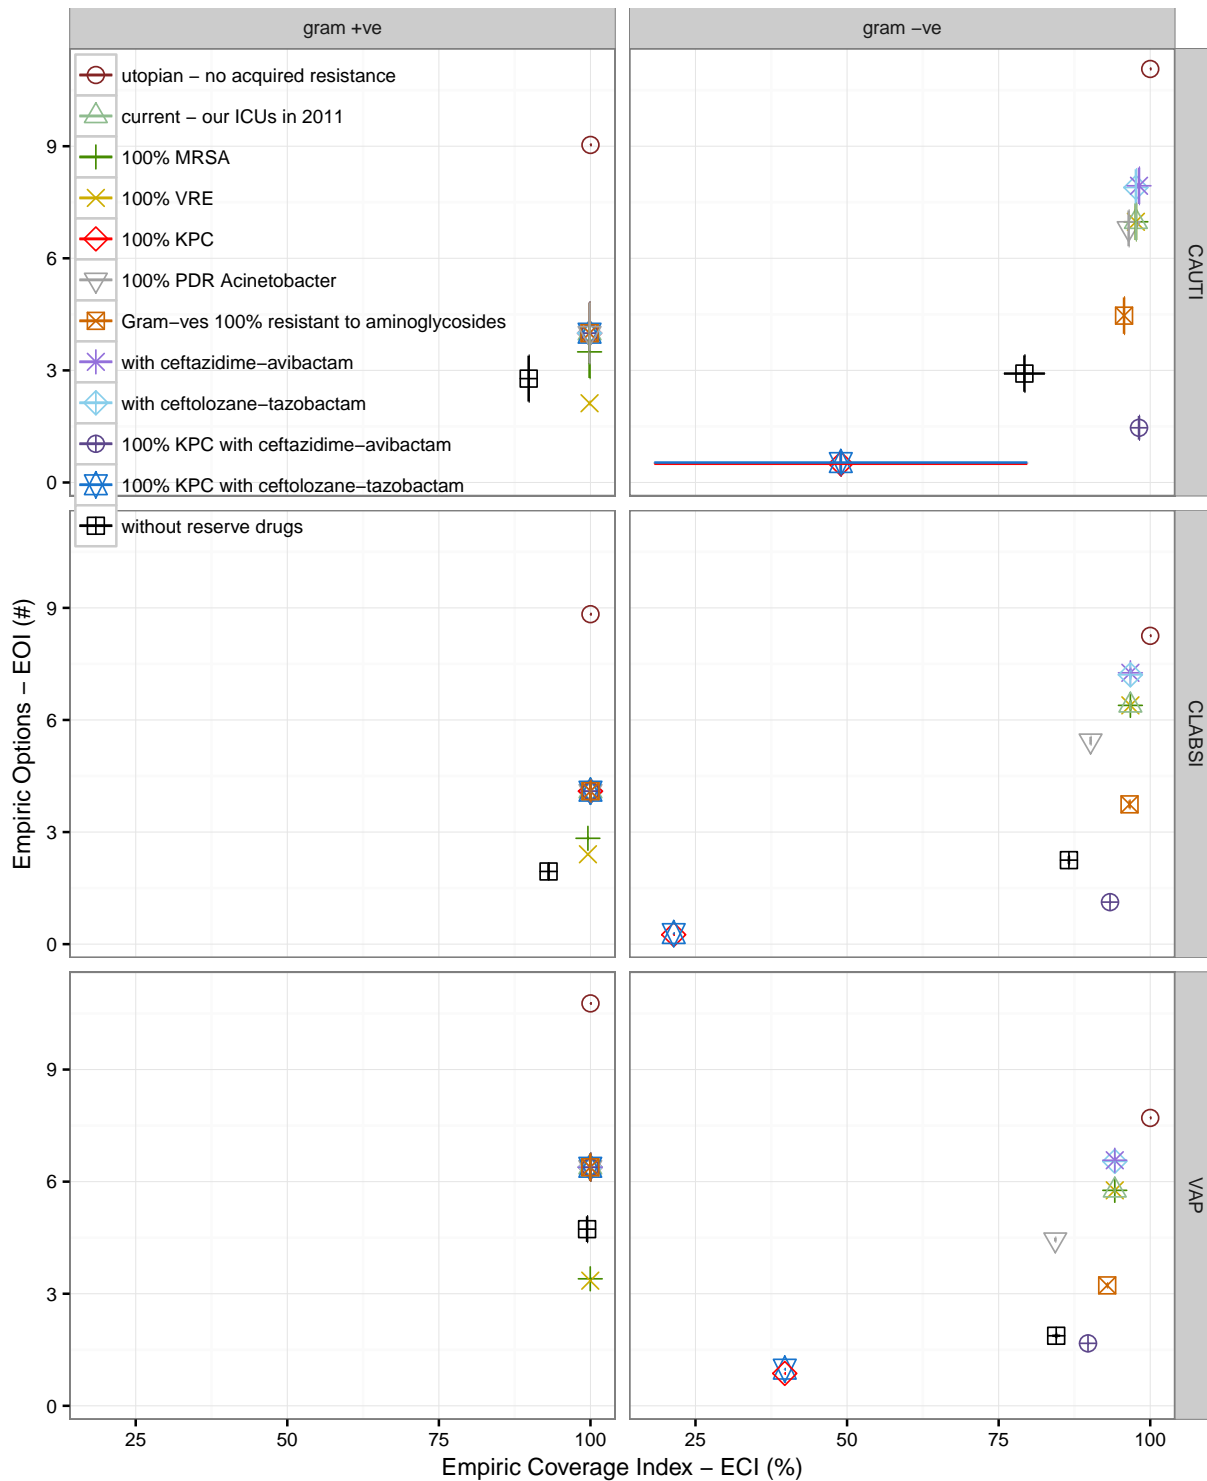

Figure C.2: Variation in ECI and EOI among hypothetical scenarios for each infection type. See figure 4 for explanations of the scenarios.
